# Supplementary material for: Monitoring of sedation depth in intensive care unit by therapeutic drug monitoring? A prospective observation study of medical intensive care patients
Source: PubMed Central journal article supplement (PMC6137863; doi:10.1186/s40560-018-0331-7), 2018-09-14
Supplement: 40560_2018_331_MOESM1_ESM.pdf [file 40560_2018_331_MOESM1_ESM.pdf]

| <b>Score</b> | <b>Term</b>       | <b>Description</b>                                                                             |
|--------------|-------------------|------------------------------------------------------------------------------------------------|
| + 4          | combative         | overtly combative or violent; immediate danger to staff                                        |
| + 3          | high agitation    | pulls on/or removes tube(s) or catheter(s) or has aggressive behavior toward staff             |
| + 2          | agitated          | frequent nonpurposeful movement or patient-ventilator dyssynchrony                             |
| + 1          | restless          | anxious or apprehensive, but movements not aggressive or vigorous                              |
| 0            | alert and calm    |                                                                                                |
| - 1          | drowsy            | not fully alert, but has sustained (more than 10 seconds) awakening, with eye contact to voice |
| - 2          | light sedation    | briefly (less than 10 seconds) awake with eye contact to voice                                 |
| - 3          | moderate sedation | any movement (but no eye contact) to voice                                                     |
| - 4          | deep sedation     | no response to voice, but any movement to physical stimulation                                 |
| - 5          | unarousable       | no response to voice or physical stimulation                                                   |
