# Supplementary material for: Monitoring of sedation depth in intensive care unit by therapeutic drug monitoring? A prospective observation study of medical intensive care patients
Source: PubMed Central journal article supplement (PMC6137863; doi:10.1186/s40560-018-0331-7), 2018-09-14
Supplement: 40560_2018_331_MOESM2_ESM.pdf [file 40560_2018_331_MOESM2_ESM.pdf]

| <b>Score</b> | <b>Description</b>                                                 |
|--------------|--------------------------------------------------------------------|
| 1            | anxious and agitated or restless or both                           |
| 2            | cooperative, orientated, tranquil                                  |
| 3            | responsive to commands only                                        |
| 4            | brisk response to light glabellar tap or loud auditory stimulus    |
| 5            | sluggish response to light glabellar tap or loud auditory stimulus |
| 6            | no response to light glabellar tap or loud auditory stimulus       |
