# Supplementary material for: Monitoring of sedation depth in intensive care unit by therapeutic drug monitoring? A prospective observation study of medical intensive care patients
Source: PubMed Central journal article supplement (PMC6137863; doi:10.1186/s40560-018-0331-7), 2018-09-14
Supplement: 40560_2018_331_MOESM3_ESM.pdf [file 40560_2018_331_MOESM3_ESM.pdf]

| <b>BIS-index</b> | <b>Clinic</b>           |
|------------------|-------------------------|
| 100              | awake patient           |
| 80               | light-moderate sedation |
| 60               | general anesthetic      |
| 40               | deep hypnosis           |
| 20               | burst suppression       |
| 0                | isoelectrical EEG       |
